# Supplementary material for: Effects of Microvibrations and Their Damping on the Evolution of Pinot Noir Wine during Bottle Storage
Source: MDPI journal article supplement (doi:10.3390/foods11182761), 2022-09-08
Supplement: s1 [file s1]

Supporting information

# Effects of Microvibrations and Their Damping on the Evolution of Pinot Noir Wine during Bottle Storage

Simone Poggesi <sup>1,2</sup>, Vakarė Merkytė <sup>1,2</sup>, Edoardo Longo <sup>1,2,\*</sup> and Emanuele Boselli <sup>1,2</sup>

<sup>1</sup> Oenolab, NOITechPark Alto Adige/Südtirol, Via A. Volta 13B, 39100 Bolzano, Italy

<sup>2</sup> Faculty of Science and Technology, Free University of Bozen-Bolzano, Piazza Università 5, 39100 Bolzano, Italy

\* Correspondence: edoardo.longo@unibz.it; Tel.: +39-0471-017691

**Citation:** Poggesi, S.; Merkytė, V.; Longo, E.; Boselli, E. Effects of Microvibrations and Their Damping on the Evolution of Pinot Noir Wine during Bottle Storage. *Foods* **2022**, *11*, x. <https://doi.org/10.3390/foods11182761>

Received: 5 August 2022

Accepted: 31 August 2022

Published: 8 September 2022

**Publisher's Note:** MDPI stays neutral with regard to jurisdictional claims in published maps and institutional affiliations.

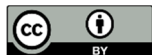

**Copyright:** © 2022 by the authors. Submitted for possible open access publication under the terms and conditions of the Creative Commons Attribution (CC BY) license (<https://creativecommons.org/licenses/by/4.0/>).

**Table S1.** Tentative compounds identification by off-line LC-DAD-QqQ-MS indicates in table by (\*) .Compound assignment validated by standard injection indicates in table by (\*\*) see <https://mona.fiehnlab.ucdavis.edu/spectra/display/VF-NPL-QEHF028220>, access on 29 July 2022.

| Label | RT (min) | UV-Vis $\lambda_{\text{MAX}}$ (nm) | Observed ESI- mass ( <i>m/z</i> ) |     |     | Tentative assignment              | Ref. |
|-------|----------|------------------------------------|-----------------------------------|-----|-----|-----------------------------------|------|
| x.1   | 5.0      | 264                                | 179                               |     |     |                                   |      |
| x.2   | 7.6      | 255                                | 337                               | 111 |     | <i>p</i> -coumaroyl-quinic acid   | [13] |
| x.3   | 10.5     | 288                                | 269                               |     |     |                                   |      |
| x.4   | 12.4     | 266                                | 265                               | 219 |     |                                   |      |
| x.5   | 16.0     | 310                                | 591                               |     |     |                                   |      |
| x.6   | 16.7     | 275                                | 169                               |     |     | Gallic acid (*)                   |      |
| x.7   | 20.5     | 281                                | 591                               | 156 |     |                                   |      |
| x.8   | 22.0     | 320                                | 243                               |     |     |                                   |      |
| x.9   | 23.8     | 284                                | 368 (367)                         | 305 | 193 | Feruloyl-quinic acid              | [14] |
| x.10  | 24.4     | 264,294                            | 219                               | 173 | 111 | Shikimic acid, formic acid adduct | [15] |
| x.11  | 26.7     | 295,330                            | 623                               | 311 |     | <i>Trans</i> -caftaric acid (*)   |      |
| x.12  | 29.1     | 280                                | 640                               | 577 |     | Procyanidin dimer-1               |      |
| x.13  | 30.4     |                                    | 175                               | 115 |     | Ascorbic acid derivative          | (**) |
| x.14  | 31.1     | 278                                | 640                               | 577 |     | Procyanidin dimer-2               |      |
| x.16  | 32.6     | 280,310                            | 295                               | 163 | 149 | Coutaric acid                     | [16] |
| x.17  | 33.2     | 280                                | 579                               | 352 | 289 |                                   |      |
| x.18  | 35.6     | 280                                | 640                               | 577 |     | Procyanidin dimer-3               |      |
| x.19  | 36.4     | 295,325                            | 179                               | 135 |     | <i>Trans</i> -caffeic acid (*)    |      |
| x.20  | 37.9     | 285                                | 579                               | 352 | 289 |                                   |      |
| x.21  | 41.1     | 285                                | 582                               | 382 | 319 |                                   |      |
| x.22  | 42.7     | 290                                | 528                               | 465 |     |                                   |      |
| x.23  | 43.3     | 275                                | 197                               |     |     | Syringic acid (*)                 |      |
| x.24  | 44.4     | 285,310                            | 528                               |     |     |                                   |      |
| x.25  | 49.4     | 290                                | 449                               | 512 | 303 | Astilbin (isomer 1) (*)           |      |
| x.26  | 51.8     | 285                                | 133                               | 183 | 339 |                                   |      |
| x.27  | 52.5     | 292                                | 449                               | 512 |     | Astilbin (isomer 2)               | [17] |

**Table S2.** Tentative compounds identification by GC × GC-TOF/MS analysis.

|       | <b>Tentative identification</b>                       | <b>RT I° dim(min)</b> | <b>RT II° dim(sec)</b> |
|-------|-------------------------------------------------------|-----------------------|------------------------|
| I     | Acetaldehyde                                          | 3.30                  | 0.91                   |
| II    | Ethyl acetate                                         | 4.67                  | 1.74                   |
| III   | n-propyl acetate                                      | 5.51                  | 1.61                   |
| IV    | Cyclopropane (NI)                                     | 12.97                 | 0.88                   |
| V     | 1-butanol, 3-methyl-                                  | 17.27                 | 1.10                   |
| VI    | 1-hexanol                                             | 23.65                 | 1.74                   |
| VII   | 4-amino-1-butanol (NI)                                | 23.65                 | 1.31                   |
| VIII  | Propanoic acid, 2-hydroxy-, ethyl ester               | 23.65                 | 1.01                   |
| IX    | Octanoic acid, ethyl ester                            | 27.74                 | 0.35                   |
| X     | 2-furancarboxaldehyde, 5-methyl-                      | 32.99                 | 0.99                   |
| XI    | Isoamyl lactate                                       | 33.16                 | 1.17                   |
| XII   | Butyrolactone                                         | 35.62                 | 1.30                   |
| XIII  | Decanoic acid, ethyl ester                            | 35.87                 | 0.43                   |
| XIV   | Butanedioic acid, diethyl ester                       | 37.79                 | 1.47                   |
| XV    | 3-buten-2-one, 4-(2,6,6-trimethyl-1-cyclohexen-1-yl)- | 38.54                 | 2.44                   |
| XVI   | Dodecanoic acid, ethyl ester                          | 43.09                 | 0.07                   |
| XVII  | Phenylethyl Alcohol                                   | 46.05                 | 0.92                   |
| XVIII | 2,4-di-tert-butylphenol                               | 55.97                 | 0.93                   |
| XIX   | Hexadecanoic acid, ethyl ester                        | 56.64                 | 0.16                   |

**Table S3.** ANOVA results for factor Time on the phenolic compounds.

|                  | Phenolic compounds – Retention times (min) |                 |               |                |                |                 |               |                |               |               |               |                 |                |                |               |
|------------------|--------------------------------------------|-----------------|---------------|----------------|----------------|-----------------|---------------|----------------|---------------|---------------|---------------|-----------------|----------------|----------------|---------------|
|                  | 5.0                                        | 7.6             | 10.5          | 12.4           | 16.0           | 16.7            | 20.5          | 22.0           | 23.8          | 24.4          | 26.6          | 26.7            | 29.1           | 30.4           | 31.1          |
| T1               | 29721.45<br>b                              | 116831.83<br>a  | 33346.17<br>b | 91877.17<br>b  | 108933.00<br>c | 1058927.17<br>b | 61696.33<br>b | 70209.25<br>a  | 35179.17<br>b | 30172.64<br>c | 28746.22<br>a | 400089.83<br>c  | 288443.67<br>b | 68946.17<br>c  | 55238.67<br>a |
| T3               | 25438.91<br>c                              | 53523.25 c      | 48765.98<br>a | 92757.25<br>b  | 83564.13<br>d  | 1078916.75<br>b | 61234.88<br>b | 30021.63<br>c  | 50261.38<br>a | 33234.38<br>b | 26929.25<br>b | 410046.25<br>bc | 291589.88<br>b | 91615.88<br>b  | 56213.38<br>a |
| T6               | 32346.75<br>b                              | 80612.38<br>bc  | 50518.13<br>a | 85266.25<br>c  | 120062.25<br>b | 1059315.25<br>b | 63323.00<br>b | 40927.00<br>b  | 48145.13<br>a | 33959.25<br>b | 29034.75<br>a | 415211.13<br>b  | 274217.38<br>c | 83690.25<br>b  | 44680.38<br>b |
| T12              | 55690.75<br>a                              | 104603.88<br>ab | 29866.99<br>c | 290641.50<br>a | 295549.13<br>a | 2160025.38<br>a | 68521.00<br>a | 36303.15<br>bc | 52218.88<br>a | 68114.00<br>a | 28452.30<br>a | 782966.38<br>a  | 540286.38<br>a | 375386.38<br>a | 28984.22<br>c |
| Pr ><br>F(Model) | <0.0001                                    | 0.00            | <0.0001       | <0.0001        | <0.0001        | <0.0001         | <0.0001       | <0.0001        | <0.0001       | <0.0001       | 0.00          | <0.0001         | <0.0001        | <0.0001        | <0.0001       |
| Significant      | Yes                                        | Yes             | Yes           | Yes            | Yes            | Yes             | Yes           | Yes            | Yes           | Yes           | Yes           | Yes             | Yes            | Yes            | Yes           |

  

|                  | Phenolic compounds – Retention times (min) |                |               |                |                |                 |                |                |                |                |                |                |                |                |               |
|------------------|--------------------------------------------|----------------|---------------|----------------|----------------|-----------------|----------------|----------------|----------------|----------------|----------------|----------------|----------------|----------------|---------------|
|                  | 31.9                                       | 32.6           | 33.2          | 35.6           | 36.4           | 37.2            | 37.9           | 41.1           | 42.7           | 43.3           | 44.4           | 46.9           | 49.4           | 51.8           | 52.5          |
| T1               | 25023.82<br>c                              | 390148.67<br>c | 80475.81<br>a | 54365.33<br>c  | 312371.17<br>c | 134505.83<br>c  | 142955.83<br>c | 53633.50<br>c  | 117525.83<br>a | 178998.50<br>b | 175618.83<br>c | 48875.00 c     | 396962.50<br>b | 31176.76<br>bc | 31660.17<br>b |
| T3               | 46609.88<br>a                              | 563175.75<br>b | 28735.18<br>b | 184114.88<br>b | 349113.88<br>b | 142106.63<br>b  | 166659.38<br>b | 64891.38<br>b  | 108556.88<br>b | 188675.25<br>b | 212614.00<br>b | 55583.00 b     | 403599.50<br>b | 32726.75<br>b  | 33318.50<br>b |
| T6               | 46425.00<br>a                              | 545341.25<br>b | 47041.69<br>b | 178006.38<br>b | 293441.25<br>c | 140758.00<br>bc | 163162.25<br>b | 61410.75<br>bc | 60545.88<br>d  | 140397.75<br>c | 176560.88<br>c | 54156.88<br>bc | 375450.50<br>c | 27362.72<br>c  | 37359.38<br>b |
| T12              | 31481.07<br>b                              | 742864.38<br>a | 39705.75<br>b | 285138.63<br>a | 646516.88<br>a | 298254.63<br>a  | 271463.75<br>a | 123903.38<br>a | 100478.25<br>c | 252549.75<br>a | 323034.88<br>a | 129562.63<br>a | 789546.75<br>a | 71221.75<br>a  | 79880.63<br>a |
| Pr ><br>F(Model) | <0.0001                                    | <0.0001        | 0.00          | <0.0001        | <0.0001        | <0.0001         | <0.0001        | <0.0001        | <0.0001        | <0.0001        | <0.0001        | <0.0001        | <0.0001        | <0.0001        | <0.0001       |
| Significant      | Yes                                        | Yes            | Yes           | Yes            | Yes            | Yes             | Yes            | Yes            | Yes            | Yes            | Yes            | Yes            | Yes            | Yes            | Yes           |

a, ab, b, bc, c letters indicate the subgrouping created by the Tukey HSD test.

**Table S4.** ANOVA results for factor Time on the volatile compounds.

|               | I        | II       | III     | IV        | V          | VI      | VII     | VIII     | IX       | X       | XI      | XII     | XIII     | XIV      | XV      | XVI     | XVII      | XVIII     | XIX     |
|---------------|----------|----------|---------|-----------|------------|---------|---------|----------|----------|---------|---------|---------|----------|----------|---------|---------|-----------|-----------|---------|
| T0            | 52.44 b  | 20.88 c  | 0.09 b  | 41.02 bc  | 104.66 c   | 0.00 b  | 0.61 b  | 10.31 d  | 6.32 b   | 1.45 cd | 1.08 d  | 2.54 c  | 1.20 b   | 69.25 cd | 0.92 cd | 0.54 c  | 387.62 cd | 111.22 ab | 0.71 c  |
| T1            | 171.43 a | 101.39 b | 8.97 a  | 547.09 a  | 1112.06 a  | 1.19 b  | 5.27 b  | 81.60 b  | 72.53 a  | 3.89 b  | 34.91 b | 17.61 a | 28.51 a  | 343.72 a | 4.04 a  | 1.61 ab | 1466.69 a | 127.46 a  | 11.50 a |
| T3            | 22.17 b  | 23.92 c  | 1.15 b  | 18.20 c   | 234.69 c   | 0.65 b  | 2.82 b  | 18.90 cd | 36.42 ab | 0.90 d  | 2.76 d  | 2.63 c  | 13.97 ab | 106.76 c | 1.43 bc | 0.90 bc | 377.75 d  | 30.36 c   | 3.39 c  |
| T6            | 41.60 b  | 64.28 bc | 0.78 b  | 283.36 b  | 814.35 b   | 1.26 b  | 38.41 a | 215.42 a | 85.24 a  | 4.55 a  | 59.09 a | 5.61 b  | 34.66 a  | 250.61 b | 2.21 b  | 2.33 a  | 472.35 c  | 21.47 c   | 8.15 b  |
| T12           | 48.26 b  | 540.95 a | 8.37 a  | 427.11 ab | 1015.97 ab | 6.16 a  | 5.40 b  | 46.15 c  | 0.36 b   | 2.50 c  | 21.04 c | 1.78 c  | 0.23 b   | 38.77 d  | 0.40 d  | 0.18 c  | 585.19 b  | 89.19 b   | 7.08 b  |
| Pr > F(Model) | <0.0001  | <0.0001  | <0.0001 | <0.0001   | <0.0001    | <0.0001 | <0.0001 | <0.0001  | <0.0001  | <0.0001 | <0.0001 | <0.0001 | <0.0001  | <0.0001  | <0.0001 | <0.0001 | <0.0001   | <0.0001   | <0.0001 |
| Significant   | Yes      | Yes      | Yes     | Yes       | Yes        | Yes     | Yes     | Yes      | Yes      | Yes     | Yes     | Yes     | Yes      | Yes      | Yes     | Yes     | Yes       | Yes       | Yes     |

a, ab, b, bc, c letters indicate the subgrouping created by the Tukey HSD test.

## References

13. Lee, Y.G.; Cho, J.Y.; Kim, C.M.; Lee, S.H.; Kim, W.S.; Jeon, T.I.; Park, K.H. Moon, J.H. Coumaroyl quinic acid derivatives and flavonoids from immature pear (*Pyrus pyrifolia* Nakai) fruit. *Food Sci. Biotechnol.* **2013**, *22*, 803–810. <https://doi.org/10.1007/s10068-013-0148-z>.
14. Kuhnert, N.; Jaiswal, R.; Matei, M.F.; Sovdat, T.; Deshpande, S. How to distinguish between feruloyl quinic acids and isoferuloyl quinic acids by liquid chromatography/tandem mass spectrometry. *Rapid Commun. Mass Spectrom.* **2010**, *24*, 1575–1582. <https://doi.org/10.1002/rcm.4537>.
15. Ivanova-Petropulos, V.; Naceva, Z.; Sándor, V.; Makszin, L.; Deutsch-Nagy, L.; Berkics, B.; Stafilov, T. Kilar, F. Fast determination of lactic, succinic, malic, tartaric, shikimic, and citric acids in red Vranec wines by CZE-ESI-QTOF-MS. *Electrophoresis* **2018**, *39*, 1597–1605. <https://doi.org/10.1002/elps.201700492>.
16. Baranowski, J.D.; Nagel, C.W. Isolation and identification of the hydroxycinnamic acid derivatives in white Riesling wine. *Am. J. Enol. Vitic.* **1981**, *32*, 5–13.
17. Fayad, S.; Le Scanff, M.; Waffo-Tegu, P.; Marchal, A. Understanding sweetness of dry wines: First evidence of astilbin isomers in red wines and quantitation in a one-century range of vintages. *Food Chem.* **2021**, *352*, 129293. <https://doi.org/10.1016/j.foodchem.2021.129293>.
